# Supplementary material for: Long-Term Effect on Bioactive Components and Antioxidant Activity of Thermal and High-Pressure Pasteurization of Orange Juice
Source: PubMed Central journal article supplement (PMC6222786; doi:10.3390/molecules23102706), 2018-10-20
Supplement: molecules-23-02706-s001.pdf [file molecules-23-02706-s001.pdf]

## Supplementary Material

**Table S1.** TPC (mg gallic acid equivalents/100 mL) of fresh, thermal pasteurized (TP) and high-pressure processed (HPP) orange juices and respective statistical data.

| Time of storage (days) | Fresh <sup>a</sup> | TP             | HPP             |
|------------------------|--------------------|----------------|-----------------|
| 0                      | 89.00±5.40 A       | 90.40±4.31 eA  | 84.80±4.70 aA   |
| 4                      | A                  | 89.30±0.81 deA | 86.90±5.20 aA   |
| 15                     | A                  | 81.80±4.05 cdA | 83.90±1.90 abA  |
| 22                     | B                  | 76.60±2.72 bcA | 82.20±2.20 abAB |
| 29                     | B                  | 72.30±2.74 abA | 78.20±1.60 abA  |
| 36                     | C                  | 67.40±1.24 aA  | 75.70±0.70 bB   |

Results represent average±standard deviation (n=3). Different non-capital letters in the same treatment during storage indicate significant differences (p<0.05); Different capital letters in the same day of storage indicate significant differences between fresh, TP and HPP juices (p<0.05); <sup>a</sup> Capital letters in fresh column from 4<sup>th</sup> to 36<sup>th</sup> day indicates the statistical result of the comparison between fresh orange juice with TP and HPP juices at each sampling day.

**Table S2.** Total flavonoids content (mg rutin equivalents/100 mL) of fresh, thermal pasteurized (TP) and high-pressure processed (HPP) orange juices and respective statistical data.

| Time of storage (days) | Fresh <sup>a</sup> | TP           | HPP          |
|------------------------|--------------------|--------------|--------------|
| 0                      | 57.3±1.0 B         | 44.8±1.0 cA  | 70.8±0.3 eC  |
| 4                      | A                  | 60.8±2.0 aB  | 58.1±0.8 dAB |
| 15                     | A                  | 57.3±1.8 abA | 53.5±0.4 cB  |
| 22                     | A                  | 53.9±6.1 abA | 48.7±2.8 bA  |
| 29                     | A                  | 61.2±3.6 aB  | 45.8±2.1 abB |
| 36                     | C                  | 49.4±2.8 bcB | 43±0.1 aA    |

Results represent average±standard deviation (n=3). Different non-capital letters in the same treatment during storage indicate significant differences (p<0.05); Different capital letters in the same day of storage indicate significant differences between fresh, TP and HPP juices (p<0.05); <sup>a</sup> Capital letters in fresh column from 4<sup>th</sup> to 36<sup>th</sup> day indicates the statistical result of the comparison between fresh orange juice with TP and HPP juices at each sampling day.

**Table S3.** Total anthocyanins content (mg cyanidin-3-glucoside equivalents/100 mL) of fresh, thermal pasteurized (TP) and high-pressure processed (HPP) orange juices and respective statistical data.

| Time of storage (days) | Fresh <sup>a</sup> | TP            | HPP           |
|------------------------|--------------------|---------------|---------------|
| 0                      | 4.87±0.05 B        | 4.31±0.02 dA  | 5.03±0.01 cC  |
| 4                      | B                  | 4.11±0.11 cdA | 4.89±0.12 cB  |
| 15                     | B                  | 3.91±0.23 bcA | 4.58±0.11 aB  |
| 22                     | C                  | 3.75±0.08 abA | 4.56±0.04 aB  |
| 29                     | C                  | 3.55±0.09 aA  | 4.50±0.09 bcB |
| 36                     | C                  | 3.55±0.13 aA  | 4.30±0.10 bcB |

Results represent average±standard deviation (n=3). Different non-capital letters in the same treatment during storage indicate significant differences (p<0.05); Different capital letters in the same day of storage indicate significant differences between fresh, TP and HPP juices (P<0.05); <sup>a</sup> Capital letters in fresh column from 4<sup>th</sup> to 36<sup>th</sup> day indicates the statistical result of the comparison between fresh orange juice with TP and HPP juices at each sampling day.

**Table S4.** Total carotenoids content ( $\mu\text{g } \beta\text{-carotene equivalents/100 mL}$ ) of fresh, thermal pasteurized (TP) and high-pressure processed (HPP) orange juices and respective statistical data.

| Time of storage (days) | Fresh <sup>a</sup> | TP                  | HPP                 |
|------------------------|--------------------|---------------------|---------------------|
| 0                      | 601.0 $\pm$ 1.4 C  | 480.0 $\pm$ 1.1 eA  | 529.0 $\pm$ 10.0 eB |
| 4                      | C                  | 444.0 $\pm$ 12.6 dA | 524.0 $\pm$ 1.1 bcB |
| 15                     | C                  | 408.0 $\pm$ 5.9 cA  | 510.0 $\pm$ 8.4 bB  |
| 22                     | C                  | 360.0 $\pm$ 0.0 bA  | 491.0 $\pm$ 8.9 dB  |
| 29                     | B                  | 384.0 $\pm$ 1.1 abA | 392.0 $\pm$ 1.9 aB  |
| 36                     | C                  | 373.0 $\pm$ 2.2 aA  | 388.0 $\pm$ 5.9 aB  |

Results represent average $\pm$ standard deviation (n=3). Different non-capital letters in the same treatment during storage indicate significant differences (p<0.05); Different capital letters in the same day of storage indicate significant differences between fresh, TP and HPP juices (p<0.05); <sup>a</sup> Capital letters in fresh column from 4<sup>th</sup> to 36<sup>th</sup> day indicates the statistical result of the comparison between fresh orange juice with TP and HPP juices at each sampling day.

**Table S5.** Individual compounds content (mg/L) found in fresh and in thermal pasteurized (TP) and high-pressure processed (HPP) orange juices during storage.

| Compound                                 | Storage days | Fresh <sup>a</sup> | TP                  | HPP                  |
|------------------------------------------|--------------|--------------------|---------------------|----------------------|
| Apigenin-6,8-di-C-glucoside <sup>b</sup> | 0            | 1.04 $\pm$ 0.03 A  | 1.05 $\pm$ 0.02 aA  | 0.97 $\pm$ 0.05 aA   |
|                                          | 4            | B                  | 1.05 $\pm$ 0.05 aA  | 1.01 $\pm$ 0.01 aA   |
|                                          | 15           | B                  | 1.05 $\pm$ 0.02 aA  | 1.01 $\pm$ 0.01 aA   |
|                                          | 22           | B                  | 1.03 $\pm$ 0.01 aAB | 0.99 $\pm$ 0.02 aA   |
|                                          | 29           | B                  | 1.04 $\pm$ 0.01 aA  | 0.98 $\pm$ 0.03 aA   |
|                                          | 36           | B                  | 1.01 $\pm$ 0.04 aA  | 0.92 $\pm$ 0.13 aA   |
| Naringenin-7-O-rutinoside <sup>c</sup>   | 0            | 4.36 $\pm$ 1.70 A  | 4.52 $\pm$ 0.60 aA  | 5.10 $\pm$ 0.09 aA   |
|                                          | 4            | A                  | 4.57 $\pm$ 0.35 aA  | 5.03 $\pm$ 0.52 aA   |
|                                          | 15           | A                  | 4.53 $\pm$ 0.39 aA  | 5.23 $\pm$ 0.45 aA   |
|                                          | 22           | A                  | 4.95 $\pm$ 0.44 aA  | 4.92 $\pm$ 0.56 aA   |
|                                          | 29           | A                  | 4.76 $\pm$ 0.19 aA  | 4.78 $\pm$ 0.15 aA   |
|                                          | 36           | A                  | 4.70 $\pm$ 0.24 aA  | 4.36 $\pm$ 0.31 aA   |
| Hesperetin-7-O-rutinoside <sup>c</sup>   | 0            | 18.76 $\pm$ 0.79 A | 18.92 $\pm$ 0.74 bA | 27.34 $\pm$ 0.21 bB  |
|                                          | 4            | B                  | 27.35 $\pm$ 1.66 aA | 26.24 $\pm$ 1.30 abA |
|                                          | 15           | B                  | 27.60 $\pm$ 0.57 aA | 26.20 $\pm$ 1.05 abA |
|                                          | 22           | B                  | 27.34 $\pm$ 0.47 aA | 25.60 $\pm$ 1.41 abA |
|                                          | 29           | B                  | 26.37 $\pm$ 1.55 aA | 26.13 $\pm$ 0.71 abA |
|                                          | 36           | B                  | 26.61 $\pm$ 1.12 aA | 23.80 $\pm$ 1.69 aA  |

Results represent average $\pm$ standard deviation (n=3). Different non-capital letters in the same treatment during storage indicates significant differences (p<0.05). Different capital letters in the same day of storage indicate significant differences between fresh, TP and HPP orange juices (p<0.05). <sup>a</sup>Capital letters in fresh column at days 4 to 36 indicate statistical data used to compared TP and HPP orange juices. <sup>b</sup>quantified with quercetin at 365 nm. <sup>c</sup>quantified with naringenin at 280 nm.

**Table S6.** Antioxidant activity expressed as antiradicalar power (ARP) (mL/mg) of fresh, thermal pasteurized (TP) and high-pressure processed (HPP) orange juices and respective statistical data.

| Time of storage (days) | Fresh <sup>a</sup> | TP             | HPP            |
|------------------------|--------------------|----------------|----------------|
| 0                      | 3.270±0.007C       | 2.433±0.007 fA | 2.860±0.009 eB |
| 4                      | B                  | 2.750±0.007 eA | 2.800±0.001 fA |
| 15                     | C                  | 2.048±0.008 dA | 2.698±0.020 dB |
| 22                     | C                  | 1.679±0.020 cA | 2.577±0.022 cB |
| 29                     | B                  | 1.467±0.009 bA | 2.368±0.020 bB |
| 36                     | C                  | 1.088±0.010 aA | 2.164±0.002 aB |

Results represent average±standard deviation (n=3). Different non-capital letters in the same treatment during storage indicate significant differences (p<0.05); Different capital letters in the same day of storage indicate significant differences between fresh, TP and HPP juices (p<0.05); <sup>a</sup> Capital letters in fresh column from 4<sup>th</sup> to 36<sup>th</sup> day indicates the statistical result of the comparison between fresh orange juice with TP and HPP juices at each sampling day.

**Table S7.** Calibration data used for the HPLC-UV quantification of major phenolic components of fresh, thermal pasteurized (TP) and high-pressure processed (HPP) orange juices

| Compound   | $\lambda$<br>(nm) | Concentration<br>range ( $\mu\text{g mL}^{-1}$ ) | Calibration curve <sup>a</sup> | R <sup>2</sup> | LOD <sup>b</sup><br>( $\mu\text{g mL}^{-1}$ ) | LOQ <sup>c</sup><br>( $\mu\text{g mL}^{-1}$ ) |
|------------|-------------------|--------------------------------------------------|--------------------------------|----------------|-----------------------------------------------|-----------------------------------------------|
| Naringenin | 280               | 5-200                                            | $y=623591x+1103161$            | 0.997          | 38.81                                         | 129.36                                        |
| Quercetin  | 365               | 10-100                                           | $y=665124x+1013845$            | 1.000          | 1.16                                          | 3.88                                          |

<sup>a</sup>  $y$ =peak area,  $x$ =concentration in  $\mu\text{g mL}^{-1}$ ; <sup>b</sup>LOD-limit of detection; <sup>c</sup>LOQ-limit of quantification

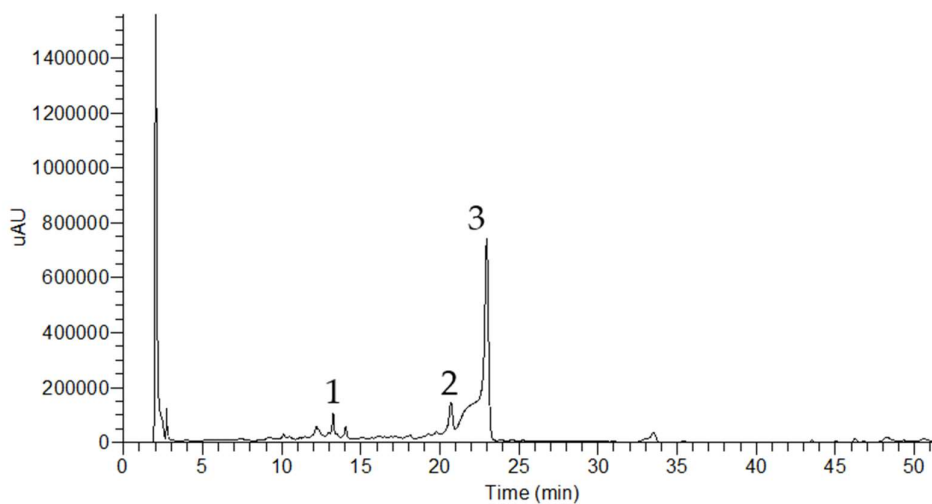

**Figure S1.** HPLC-UV chromatogram of HPP orange juice at day of the treatment, recorded at 280 nm. (1- Apigenin-6,8-di-C-glucoside, 2-Naringenin-7-O-rutinoside, 3-Hesperetin-7-O-rutinoside)
